# Supplementary material for: Influence of lateral methyl/chloro substituents on the liquid crystalline and photoswitching behaviour of bent-core mesogens bearing azobenzene wings: synthesis and characterization
Source: Royal Society of Chemistry journal article supplement (doi:10.1039/c9nj06237h), 2020-01-01
Supplement: c9nj06237h1.pdf [file c9nj06237h1.pdf]

## Influence of lateral methyl/chloro substituent on the liquid crystalline and photoswitching behaviour of bent-core mesogens bearing azobenzene wing: synthesis and characterization

Srikanth Turlapati<sup>a</sup>, Sunil B N<sup>b,c</sup>, Vinod Kumar Vishwakarma,<sup>a</sup> Ammathnadu S. Achalkumar<sup>a\*</sup>, Gurumurthy Hegde<sup>b\*</sup>

<sup>a</sup>Department of Chemistry, Indian Institute of Technology Guwahati, Guwahati 781039, Assam, India. E-mail\*: [achalkumar@iitg.ac.in](mailto:achalkumar@iitg.ac.in)

<sup>b</sup>Center for Nano-materials and Displays, B.M.S. College of Engineering, Bangalore 560019, Karnataka, India. E-mail\*: [murthyhegde@gmail.com](mailto:murthyhegde@gmail.com)

<sup>c</sup>Department of Chemistry, B.M.S. College of Engineering, Bangalore 560019, karnataka, India.

### DSC Thermograms

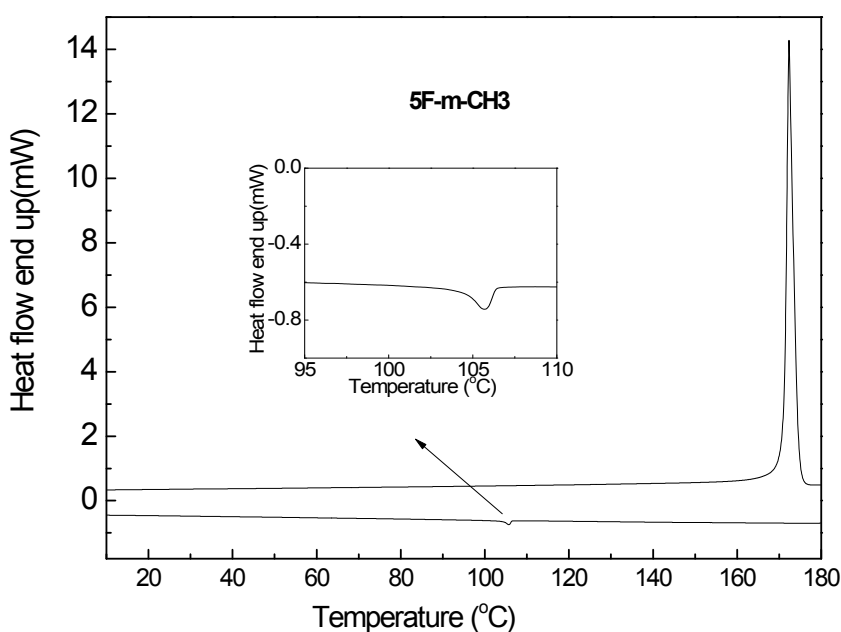

Fig. S1. DSC thermogram of 5F-o-CH<sub>3</sub>.

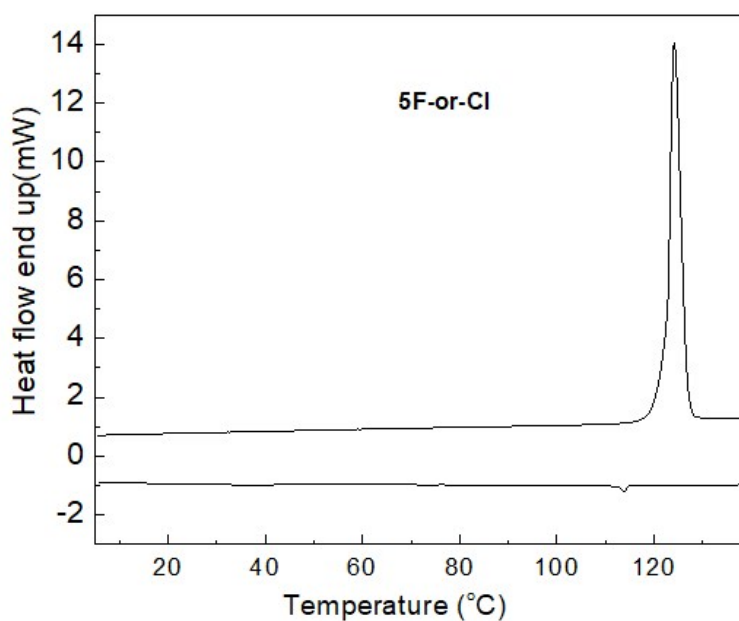

Fig. S2. DSC thermogram of 5F-o-Cl.

### <sup>1</sup>H and <sup>13</sup>C-NMR spectra

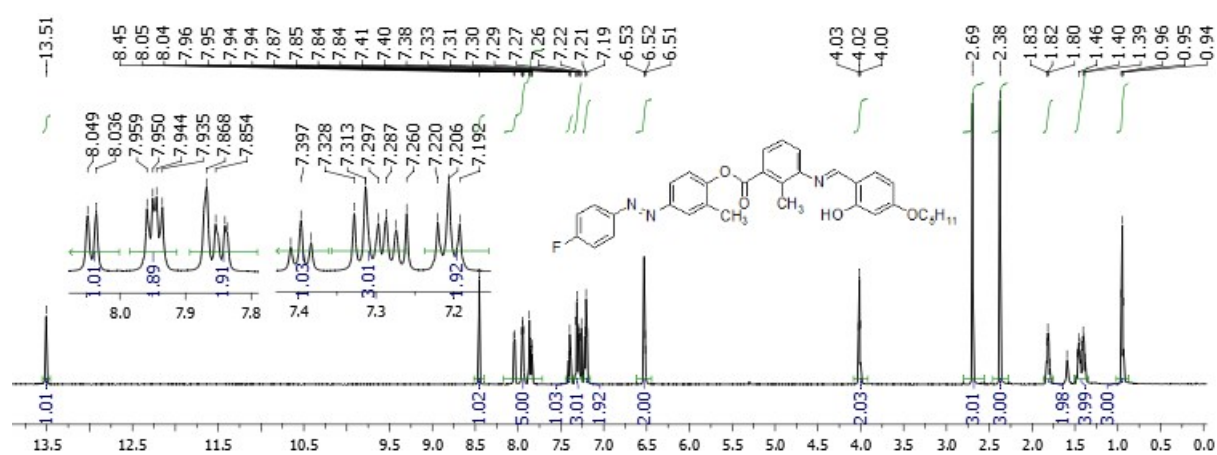

Fig. S3. <sup>1</sup>H-NMR (600 MHz) spectra of 5F-o-CH<sub>3</sub> in CDCl<sub>3</sub>.

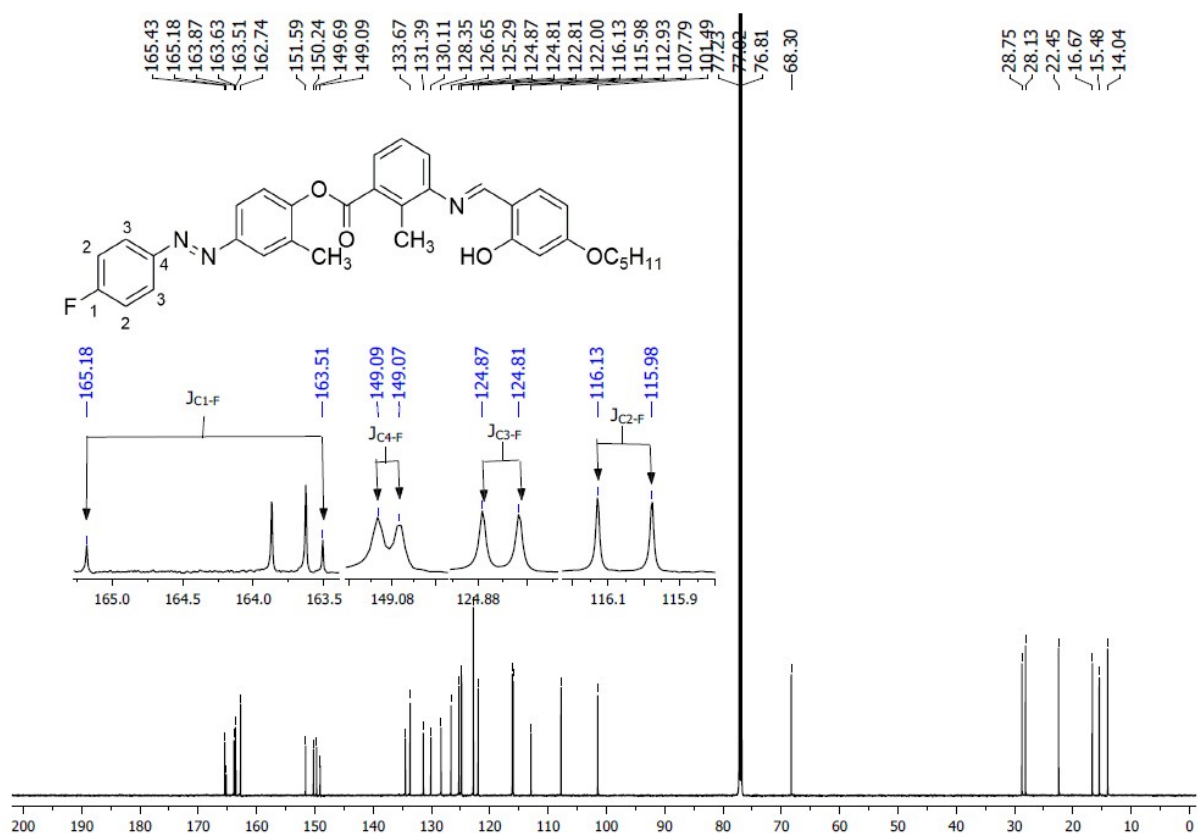

Fig. S4. <sup>13</sup>C-NMR (151 MHz) spectra of 5F-o-CH<sub>3</sub> in CDCl<sub>3</sub>.

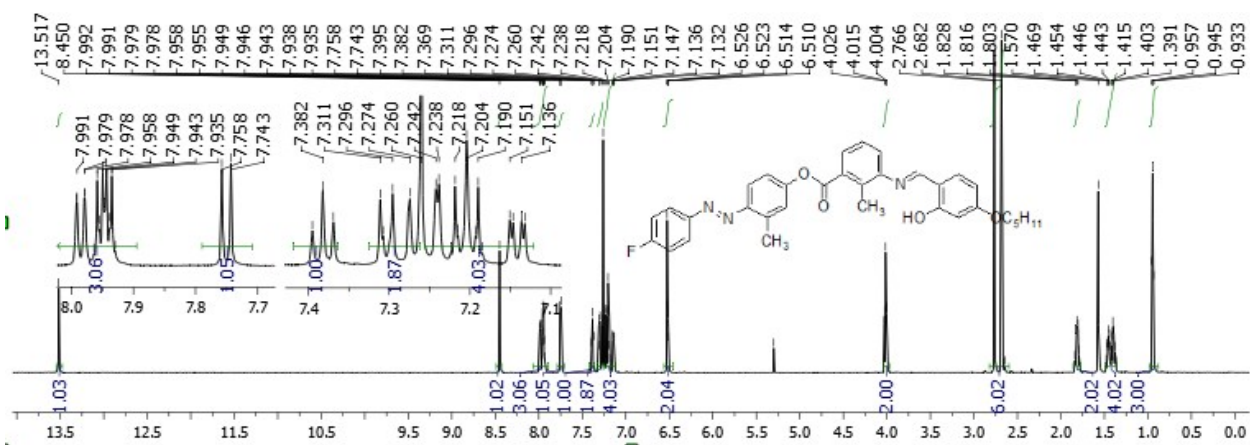

Fig. S5. <sup>1</sup>H-NMR (600 MHz) spectra of 5F-m-CH<sub>3</sub> in CDCl<sub>3</sub>.

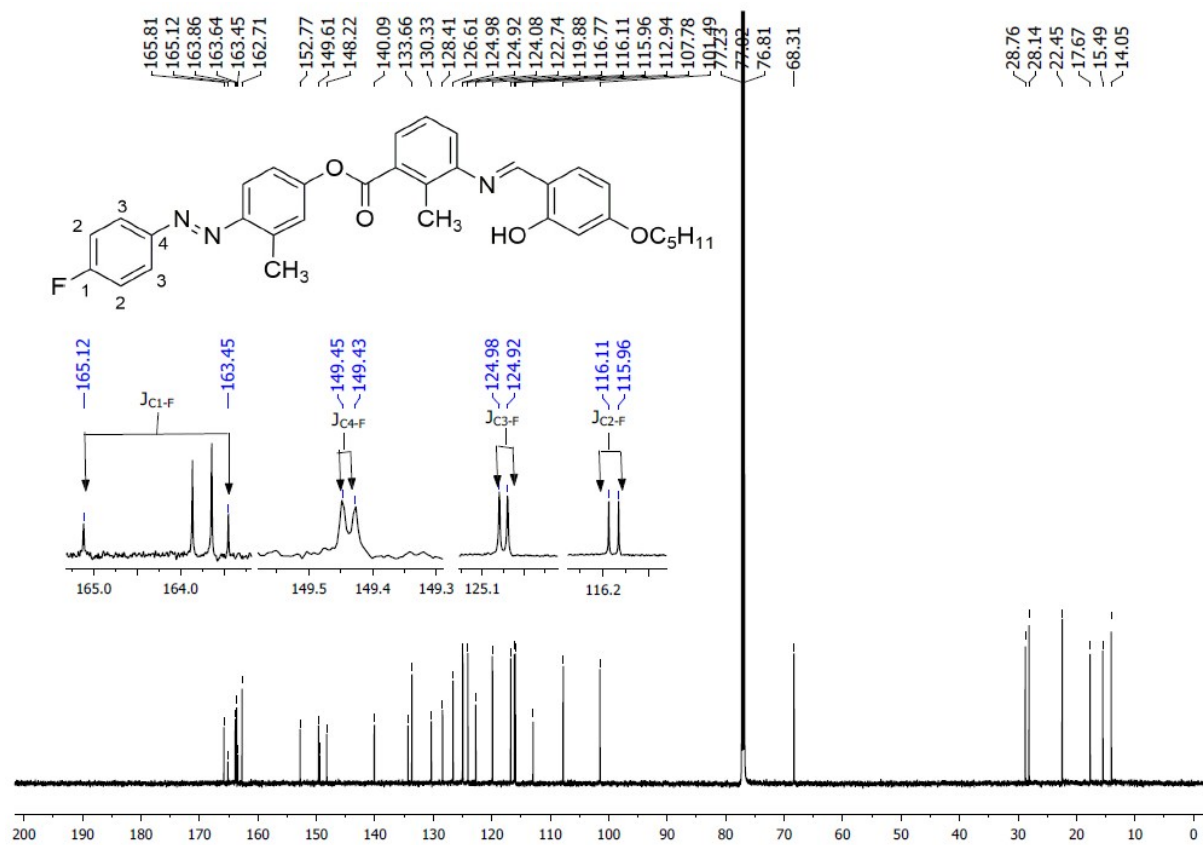

Fig. S6. <sup>13</sup>C-NMR (151 MHz) spectra of 5F-m-CH<sub>3</sub> in CDCl<sub>3</sub>.

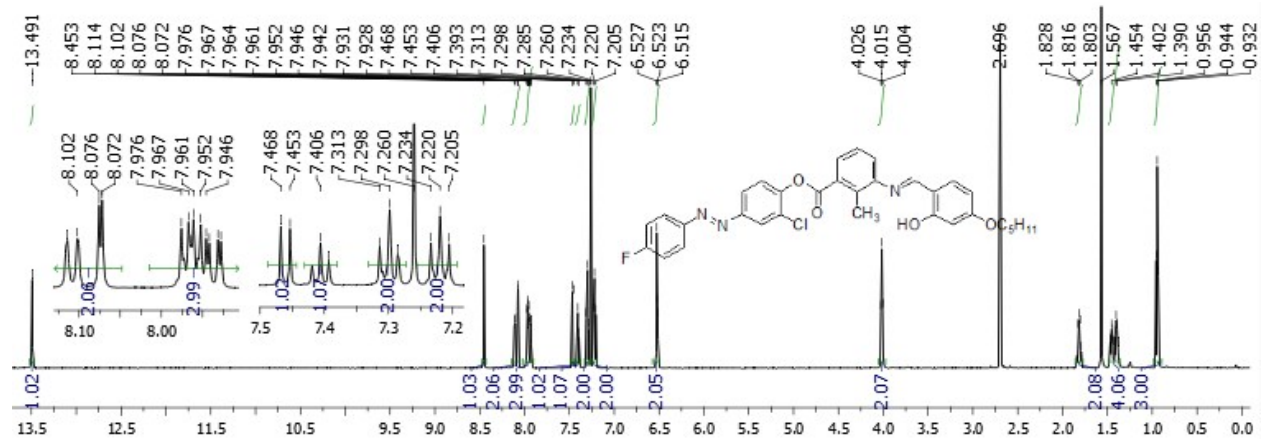

Fig. S7. <sup>1</sup>H-NMR (600 MHz) spectra of 5F-o-Cl in CDCl<sub>3</sub>.

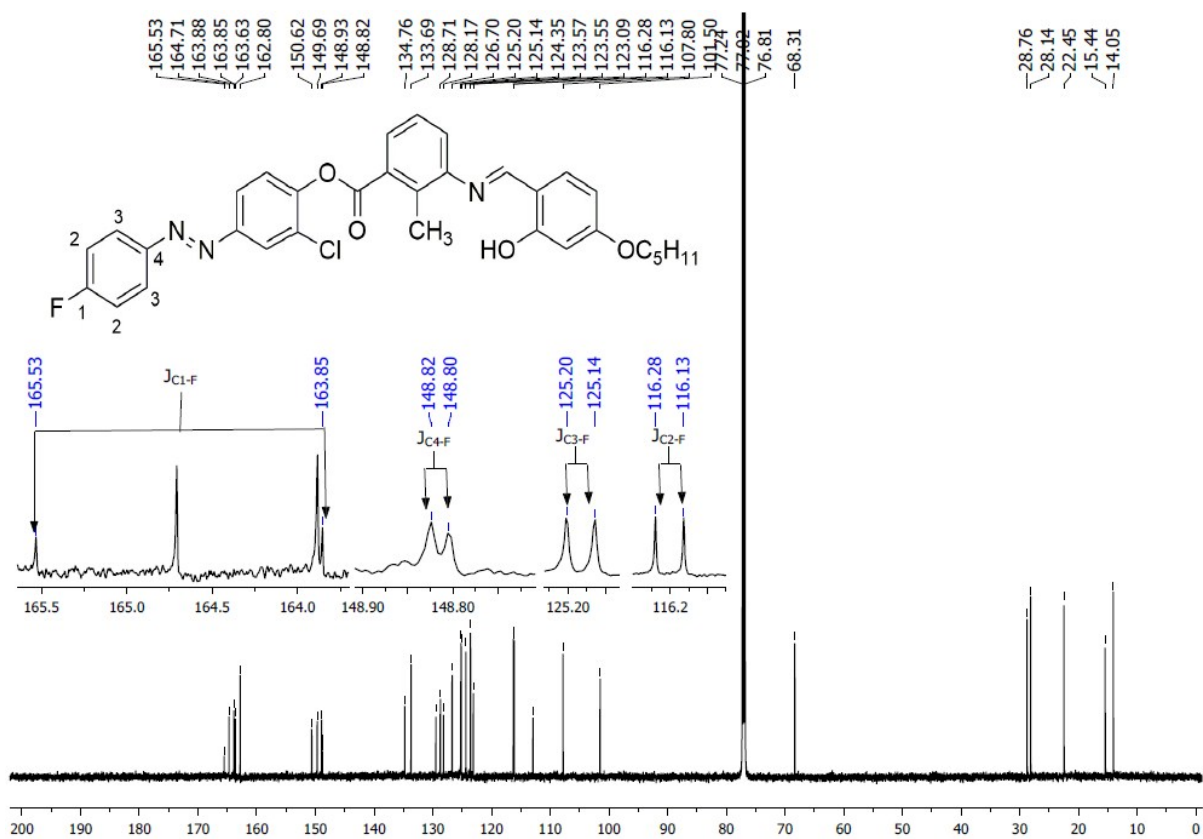

Fig. S8.  $^{13}\text{C}$ -NMR (151 MHz) spectra of 5F-o-Cl in  $\text{CDCl}_3$ .
